# Supplementary material
Source: ML conference proceedings conference paper supplement (https://proceedings.neurips.cc/paper_files/paper/2020/hash/2c75cf2681788adaca63aa95ae028b22-Abstract.html)
Supplement: Supplementary file [file 2c75cf2681788adaca63aa95ae028b22-Supplemental.zip]

---

# Supplementary Material: Object Goal Navigation using Semantically Aware Exploration

---

Anonymous Author(s)  
Affiliation  
Address  
email

## 1 A Visualizations

### With Goal-Oriented Semantic Exploration

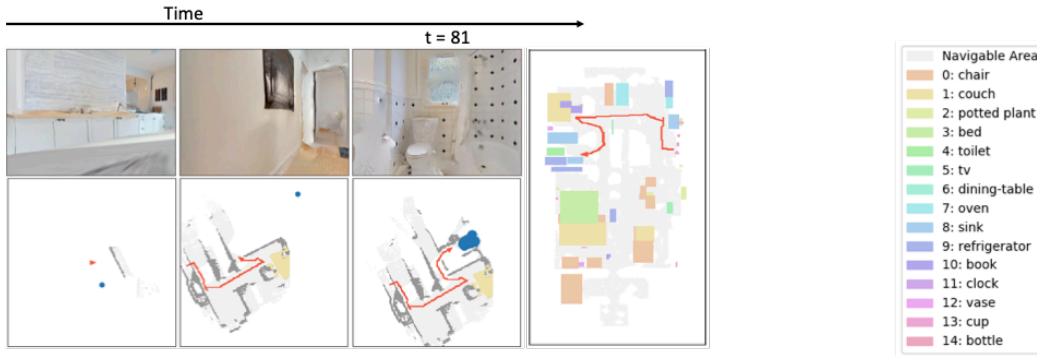

### Without Goal-Oriented Semantic Exploration

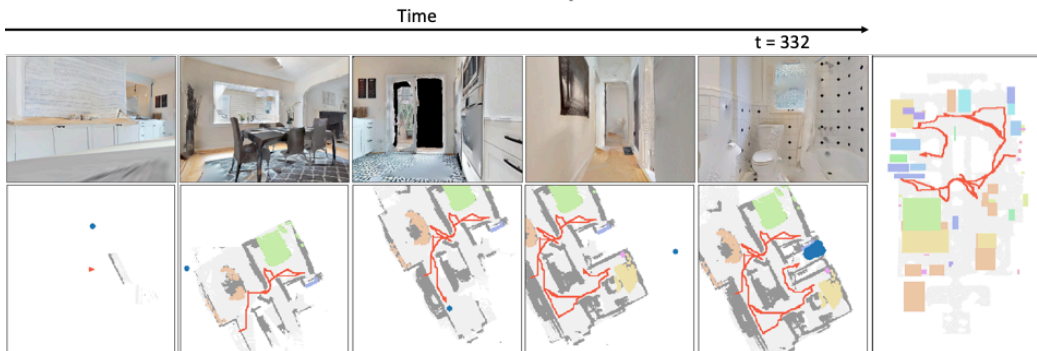

Figure 1: Figure showing an example comparing the proposed model with **(top)** and without **(bottom)** Goal-Oriented Semantic Exploration. Starting at the same location with the same goal object of ‘toilet’, the proposed model with Goal-Oriented Exploration can find the target object much faster than without Goal-Oriented Exploration.

## 2 B Hyperparameter and Architecture Details

3 We use PyTorch [3] for implementing and training our model. The denoising network in the Semantic  
4 Mapping module is a 5-layer fully convolutional network. We freeze the Mask RCNN weights in the  
5 Semantic Mapping module (except for results on Habitat Challenge) as Matterport does not contain  
6 labels for all 15 categories in our semantic map. We train the denoising network with the map-based  
7 loss on all 15 categories for Gibson frames and only 6 categories on MP3D frames.

8 The Goal-Oriented Semantic Policy is a 5 layer convolutional network followed by 3 fully connected  
9 layers. The PyTorch code for the architecture of 5 convolutional layers is the following:

```
10 self.conv_layers = nn.Sequential(  
11     nn.MaxPool2d(2),  
12     nn.Conv2d(23, 32, 3, stride=1, padding=1),  
13     nn.ReLU(),  
14     nn.MaxPool2d(2),  
15     nn.Conv2d(32, 64, 3, stride=1, padding=1),  
16     nn.ReLU(),  
17     nn.MaxPool2d(2),  
18     nn.Conv2d(64, 128, 3, stride=1, padding=1),  
19     nn.ReLU(),  
20     nn.MaxPool2d(2),  
21     nn.Conv2d(128, 64, 3, stride=1, padding=1),  
22     nn.ReLU(),  
23     nn.Conv2d(64, 32, 3, stride=1, padding=1),  
24     nn.ReLU(),  
25     Flatten()  
26 )
```

27 We use local and global maps similar to [1]. The 23 channel input to the Goal-Oriented Semantic  
28 Policy policy consists of the following: 4 channels for local map prediction (obstacles, explored area,  
29 current agent location, past agent locations), 4 channels for global map prediction (resized to local  
30 map size), 15 channels of local semantic category predictions.

31 In addition to the semantic map, we also pass the agent orientation and goal object category index as  
32 separate inputs to this Policy. They are processed by separate Embedding layers of size 8 each and  
33 added as an input to the fully-connected layers. The first fully connected layers map the convolutional  
34 layer output with embeddings to a size of 256. The input and output size of next 2 fully connected  
35 layers is 256, followed by value and action predictions for reinforcement learning.

36 We train both the modules with 86 parallel threads, with each thread using one scene in the training  
37 set. We maintain a FIFO memory of size 500000 for training the Semantic Mapping module. After  
38 one step in each thread, we perform 10 updates to the Semantic Mapping module with a batch size  
39 of 64. We use Adam optimizer with a learning rate of 0.0001. We use binary cross-entropy loss for  
40 semantic map prediction. The Goal-Oriented Semantic Policy samples a new goal every  $u = 25$   
41 timesteps. For training this policy, we use Proximal Policy Optimization (PPO) [4] with a time  
42 horizon of 20 steps, 36 mini-batches, and 4 epochs in each PPO update. Our PPO implementation is  
43 based on [2]. The reward for the policy is the decrease in distance to the nearest goal object. We  
44 use Adam optimizer with a learning rate of 0.000025, a discount factor of  $\gamma = 0.99$ , an entropy  
45 coefficient of 0.001, value loss coefficient of 0.5 for training the Goal-Oriented Semantic Policy. We  
46 will open-source the code for training and evaluating our model.

## 47 C Object categories

48 The 15 object categories used in the semantic map were: chair, couch, potted plant, bed, toilet, tv,  
49 dining-table, oven, sink, refrigerator, book, clock, vase, cup, bottle. Out of these, the first 6 (chair,  
50 couch, potted plant, bed, toilet, tv) are categories common between Gibson, MP3D and MS-COCO  
51 datasets are used for object goals.

## 52 References

- 53 [1] Devendra Singh Chaplot, Dhiraj Gandhi, Saurabh Gupta, Abhinav Gupta, and Ruslan Salakhut-  
54 dinov. Learning to explore using active neural slam. In *International Conference on Learning*  
55 *Representations (ICLR)*, 2020.
- 56 [2] Ilya Kostrikov. Pytorch implementations of reinforcement learning algorithms. [https://](https://github.com/ikostrikov/pytorch-a2c-ppo-acktr-gail)  
57 [github.com/ikostrikov/pytorch-a2c-ppo-acktr-gail](https://github.com/ikostrikov/pytorch-a2c-ppo-acktr-gail), 2018.
- 58 [3] Adam Paszke, Sam Gross, Soumith Chintala, Gregory Chanan, Edward Yang, Zachary DeVito,  
59 Zeming Lin, Alban Desmaison, Luca Antiga, and Adam Lerer. Automatic differentiation in  
60 pytorch. *NIPS 2017 Autodiff Workshop*, 2017.
- 61 [4] John Schulman, Filip Wolski, Prafulla Dhariwal, Alec Radford, and Oleg Klimov. Proximal  
62 policy optimization algorithms. *arXiv preprint arXiv:1707.06347*, 2017.
